# Supplementary material for: The unique luminescent properties and enhanced thermal stability of a novel all-inorganic perovskite CsCaCl3:Mn2+ for solid-state lighting applications
Source: Royal Society of Chemistry journal article supplement (doi:10.1039/d3tc04189a), 2023-12-12
Supplement: d3tc04189a1.pdf [file d3tc04189a1.pdf]

Supporting Information

**The Unique Luminescent Properties and Enhanced  
Thermal Stability of A Novel All-Inorganic  
Perovskite CsCaCl<sub>3</sub>:Mn<sup>2+</sup> for Solid-state Lighting  
Application**

*Zhichao Liu<sup>a</sup>, Yuexiao Pan<sup>a,\*</sup>, Xiaoxiao Fu,<sup>a</sup> Yihong Ding<sup>a</sup>, Liyi Li<sup>b,\*</sup>*

*<sup>a</sup>Key Laboratory of Carbon Materials of Zhejiang Province, College of Chemistry  
and Materials Engineering, Wenzhou University, Wenzhou 325035, P.R. China.*

*E-mail: yxpan@wzu.com*

*<sup>b</sup>School of Chemical Engineering and Technology, Sun Yat-sen University, Zhuhai  
519082, P. R. China.*

*E-mail: lily255@mail.sysu.edu.cn*

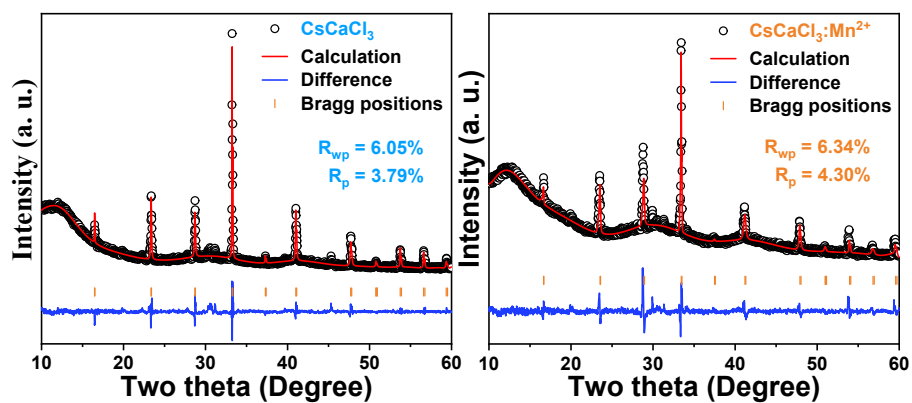

**Figure S1.** Rietveld refinement plots of the XRD patterns and experimental XRD patterns of  $\text{CsCaCl}_3$  and  $\text{CsCaCl}_3:\text{Mn}^{2+}$ .

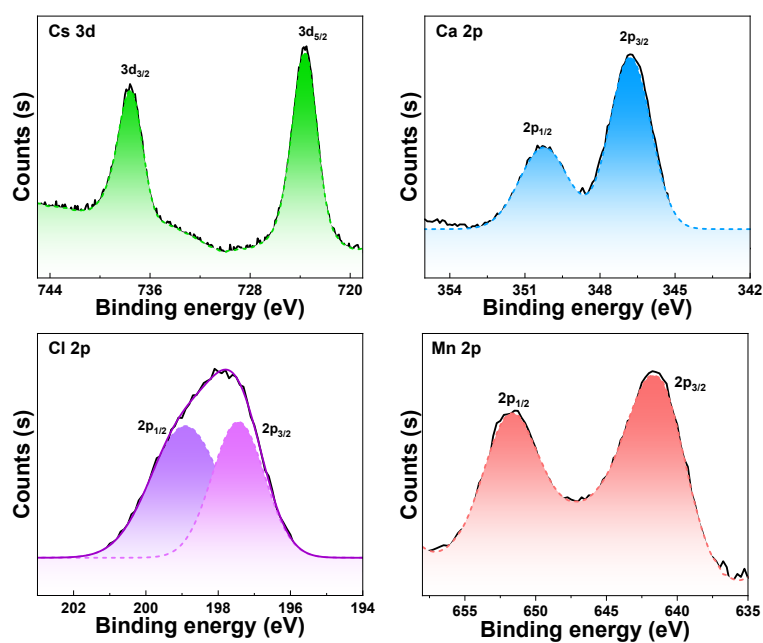

**Figure S2.** The high-resolution XPS of Cs, Ca, Cl, and Mn element in  $\text{CsCaCl}_3:\text{Mn}^{2+}$ .

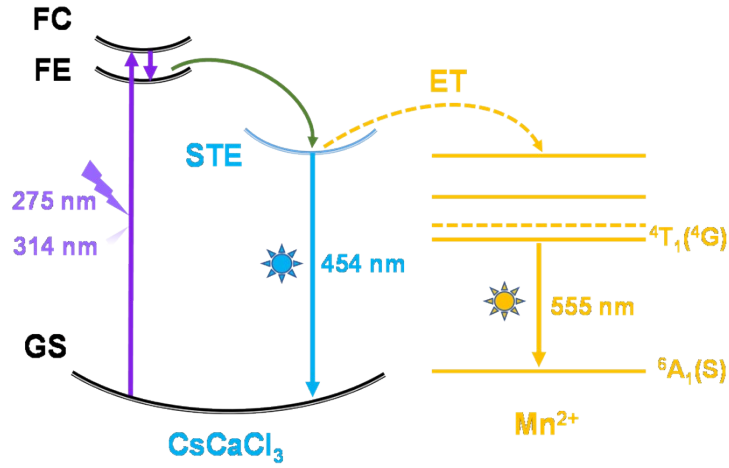

**Figure S3.** Schematic diagram illustrating the energy transfer mechanism from STE to Mn<sup>2+</sup> in CsCaCl<sub>3</sub>:Mn<sup>2+</sup>. (GS: ground state; FE: free excitons state; FC: free carrier state)

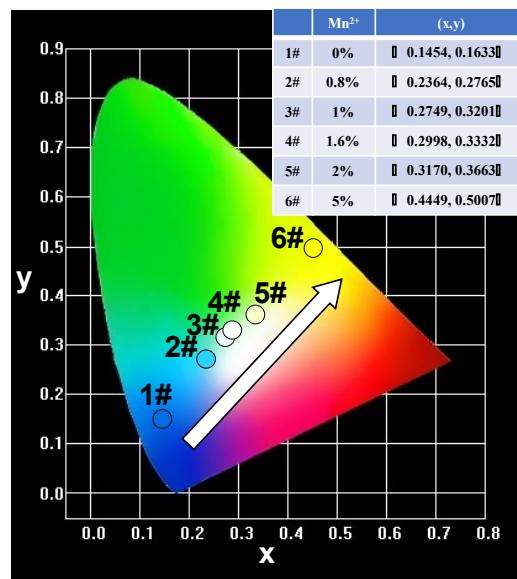

**Figure S4.** The chromaticity coordinates diagram of CsCaCl<sub>3</sub>:xMn<sup>2+</sup> (x = 0%, 0.8%, 1%, 1.6%, 2%, and 5%).

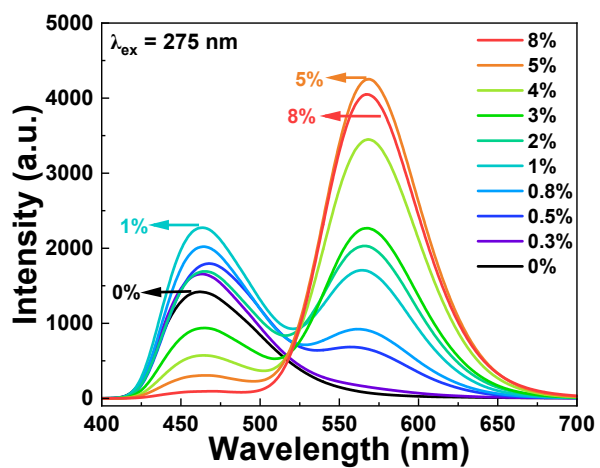

**Figure S5.** Emission spectra ( $\lambda_{\text{ex}} = 275 \text{ nm}$ ) of CsCaCl<sub>3</sub>:xMn<sup>2+</sup> varied with x value.

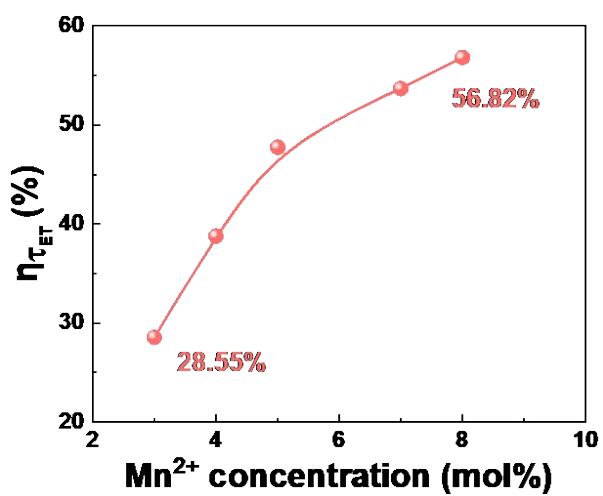

**Figure S6.** Dependence of the energy transfer efficiency from STE to Mn<sup>2+</sup> on the concentration of Mn<sup>2+</sup>.

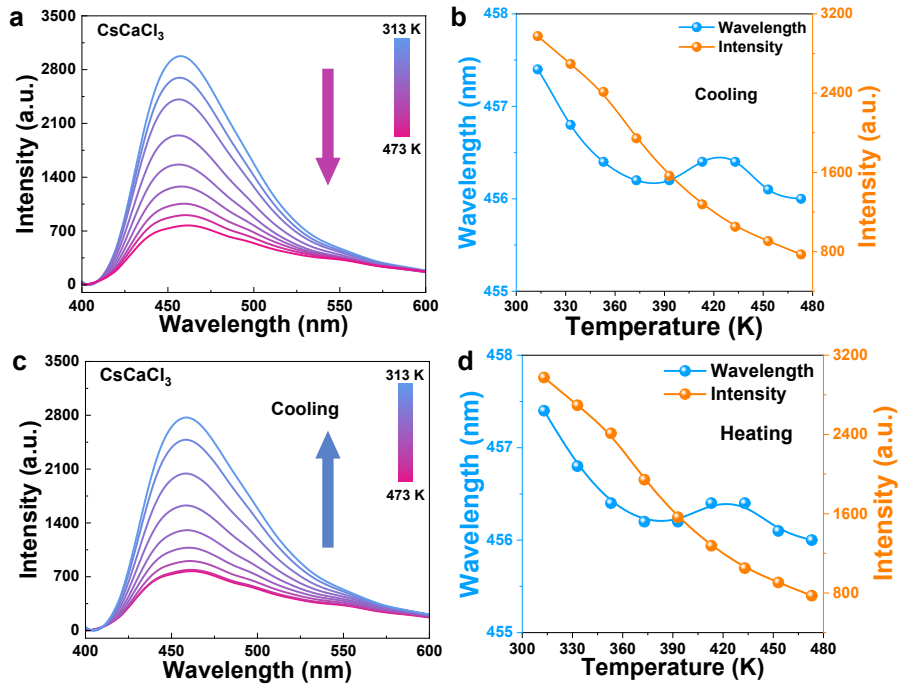

**Figure S7.** (a, c) Temperature-dependent PL emission spectra, and (b, d) Emission wavelength and intensity of CsCaCl<sub>3</sub> as a function of measurement temperature (a,b) heating and (c,d) cooling processes, respectively.

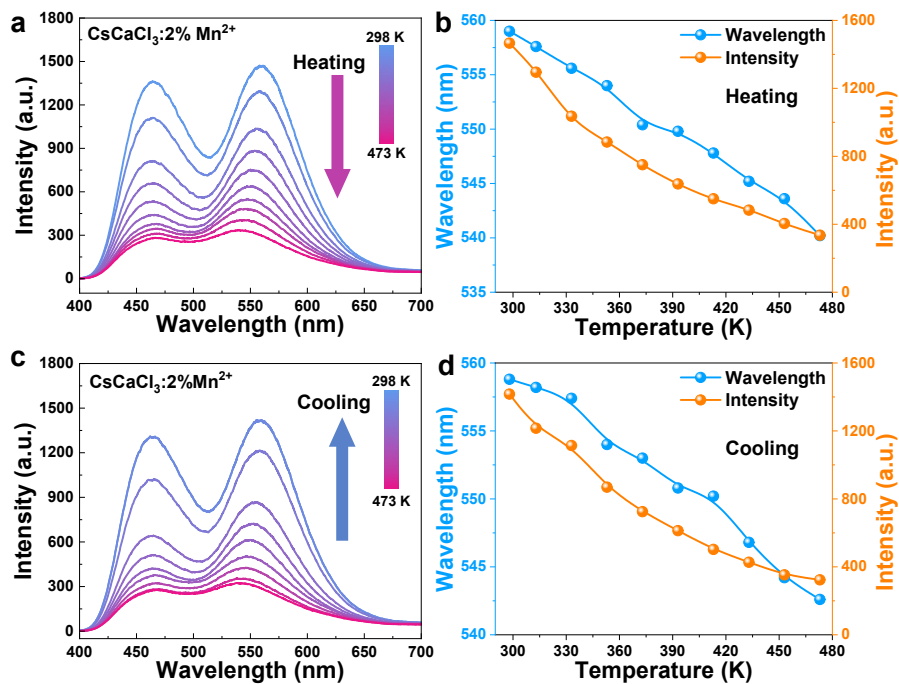

**Figure S8.** (a, c) Temperature-dependent PL emission spectra, and (b, d) Emission

wavelength and intensity of  $\text{Mn}^{2+}$  emission in  $\text{CsCaCl}_3:2\%\text{Mn}^{2+}$  as a function of measurement temperature (a,b) heating and (c,d), respectively.

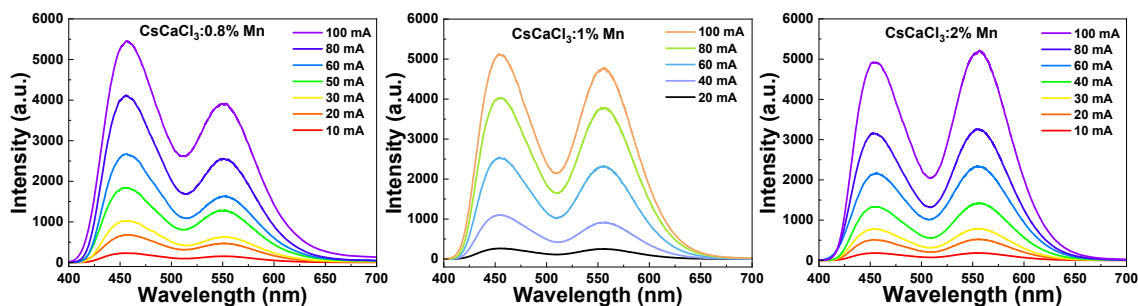

**Figure S9.** EL spectra of WLEDs fabricated with the  $\text{CsCaCl}_3:x\text{Mn}^{2+}$  ( $x = 0.8\%$ ,  $1\%$ ,  $2\%$ ) measured on various working currents.

**Table S1.** Recently reported the Debye temperatures of all-inorganic metal halide perovskite materials

| Compounds                        | Debye temperatures (K) | Refs      |
|----------------------------------|------------------------|-----------|
| $\text{Rb}_4\text{CdCl}_6$       | 154.0                  | [29]      |
| $\text{KCaF}_3$                  | 367.3                  | [39]      |
| $\text{CsPbCl}_3$                | 225.4                  | [40]      |
| $\text{RbCaF}_3$                 | 270.0                  | [41]      |
| $\text{Rb}_2\text{TeCl}_6$       | 235.2                  | [42]      |
| $\text{K}_2\text{LiAlF}_6$       | 267.0                  | [43]      |
| $\text{FAPbBr}_3$                | 205.0                  | [44]      |
| $\text{CsCaCl}_3$                | 233.7                  | This work |
| $\text{CsCaCl}_3:\text{Mn}^{2+}$ | 227.7                  | This work |

[29] J. C. Jin, Y. H. Peng, Y. T. Xu, K. Han, A. R. Zhang, X. B. Yang and Z. G. Xia,

- Chem. Mater.*, 2022, **34**, 5717-5725.
- [39] X. Liu, J. Fu, *Vacuum*, 2020, **179**, 109504.
- [40] M. A. Ghebouli, B. Ghebouli, M. Fatmi, *Physica B Conden. Matter*, 2011, **406**, 1837-1843.
- [41] K. S. Knight, *J Solid State Chem.*, 2018, **263**, 172-181.
- [42] Q. Mahmood, M. H. Alhossainy, M. S. Rashid, T. H. Flemban, H. Althib, T. Alshahrani, M. Rashid, A. Laref, *Mater. Sci. Eng. B*, 2021, **266**, 115064.
- [43] Z. Umar, M. S. Kurboniyon, O. Khyzhun, T. Yamamoto, C. G. Ma, M. G. Brik, M. Piasecki, *J. Lumin.*, 2024, **266**, 120278.
- [44] R. Mayengbam, J. T. Mazumder, *Inter. J. Energy Res.*, 2022, **46**, 17556-17575.
